# Supplementary material for: 18FDG-PET/CT and molecular markers to predict response to neoadjuvant chemotherapy and outcome in HER2-negative advanced luminal breast cancers patients
Source: PubMed Central journal article supplement (PMC5893244; doi:10.18632/oncotarget.24674), 2018-03-27
Supplement: oncotarget-09-16343-s001.pdf [file oncotarget-09-16343-s001.pdf]

## **<sup>18</sup>FDG-PET/CT and molecular markers to predict response to neoadjuvant chemotherapy and outcome in HER2-negative advanced luminal breast cancers patients**

### **SUPPLEMENTARY MATERIALS**

**Supplementary Table 1: Gene expression analysis: primers and MGB probes**

| <b>Gene Name</b> | <b>Id</b>   | <b>Forward Primer</b>    | <b>Reverse Primer</b>   | <b>Probe</b>             | <b>Amplicon size (bp)</b> | <b>exon</b> |
|------------------|-------------|--------------------------|-------------------------|--------------------------|---------------------------|-------------|
| KPNA2            | NM_002266.2 | CTCTAGGAAACATTGCAGGTGATG | AGTGGGTCAACTGCACCGTACT  | AGTGTCCGAGACTTGGTTA      | 73                        | 5-6         |
| MYBL2            | NM_002466.2 | GACAGCAGGACTGGAAGTTCCT   | ATTCAAACTCTCAGCCACCTGTA | TAACCGCACTGACCAGCAATGCCA | 86                        | 3-4         |
| CDC2 (CDK1)      | NM_001786.4 |                          | Hs04177802_m1           |                          | 109                       | 3-4         |
| CDC20            | NM_001255.2 |                          | 0426680_mH              |                          | 115                       | 10-11       |
